# Supplementary material for: GRAM: A GeneRAlized Model to predict the molecular effect of a non-coding variant in a cell-type specific manner
Source: PLOS journal article supplement (doi:10.1371/journal.pgen.1007860), 2019-08-30

**S5 Fig** Distribution of Vodds score for GM12878. The high and low variable cell specificity class are defined by the top and bottom quantile.

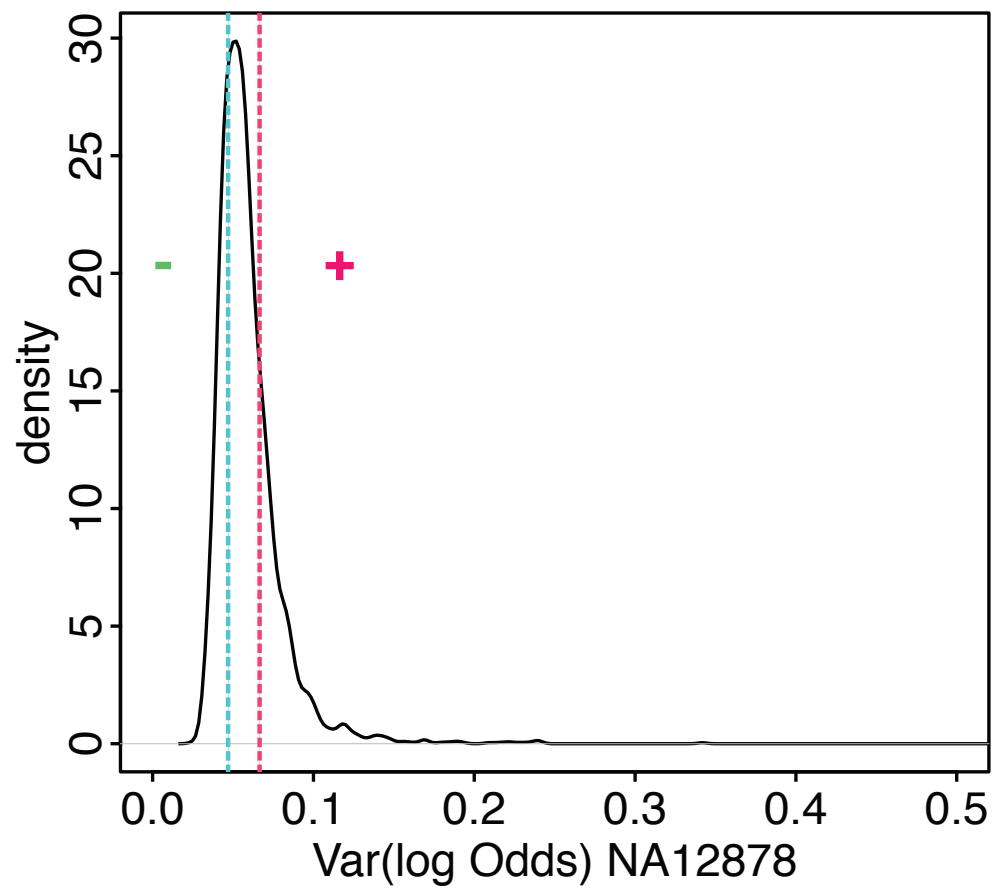

Supplement: S9 (10.1371/journal.pgen.1007860.s009) [file journal.pgen.1007860.s009]
