# Supplementary material for: GRAM: A GeneRAlized Model to predict the molecular effect of a non-coding variant in a cell-type specific manner
Source: PLOS journal article supplement (doi:10.1371/journal.pgen.1007860), 2019-08-30

**S7 Fig** Comparison of average GRAM scores with high land low posterior probability reported by Dadaev et al.

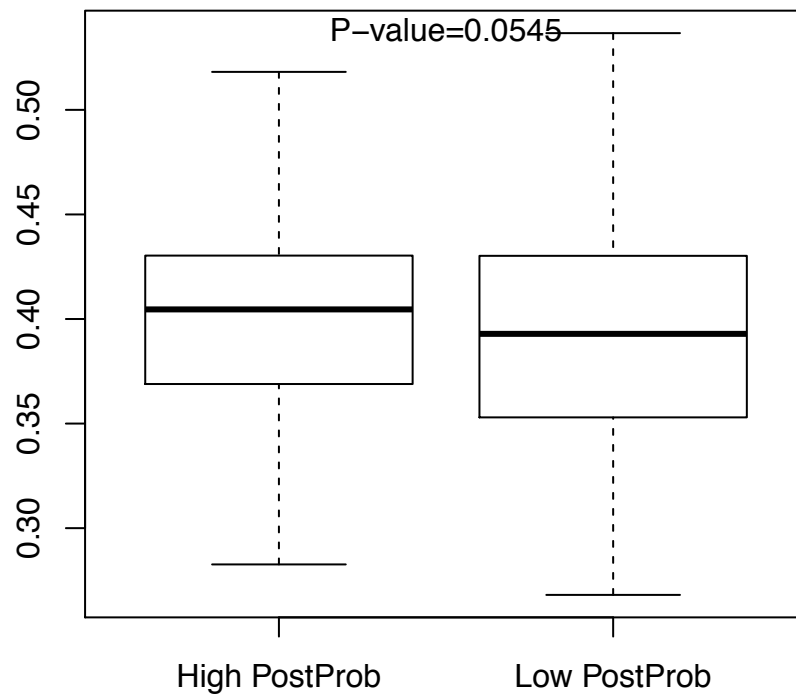

Supplement: S11 (10.1371/journal.pgen.1007860.s011) [file journal.pgen.1007860.s011]
